# Supplementary material
Source: ML conference proceedings conference paper supplement (https://openreview.net/forum?id=TAVtkpjS9P)
Supplement: supplementary_material [file attachment]

# Supplementary Materials: TDSD: Text-Driven Scene-Decoupled Weakly Supervised Video Anomaly Detection

Shengyang Sun\*  
Zhejiang University  
Hangzhou, Zhejiang, China  
sunshy@zju.edu.cn

Jiashen Hua  
Alibaba Cloud  
Hangzhou, Zhejiang, China  
jiashen.hjs@alibaba-inc.com

Junyi Feng  
Alibaba Cloud  
Hangzhou, Zhejiang, China  
felix.fjy@alibaba-inc.com

Dongxu Wei  
Alibaba Cloud  
Hangzhou, Zhejiang, China  
weidongxu.wdx@alibaba-inc.com

Baisheng Lai  
Alibaba Cloud  
Hangzhou, Zhejiang, China  
baisheng.lbs@alibaba-inc.com

Xiaojin Gong†  
Zhejiang University  
Hangzhou, Zhejiang, China  
gongxj@zju.edu.cn

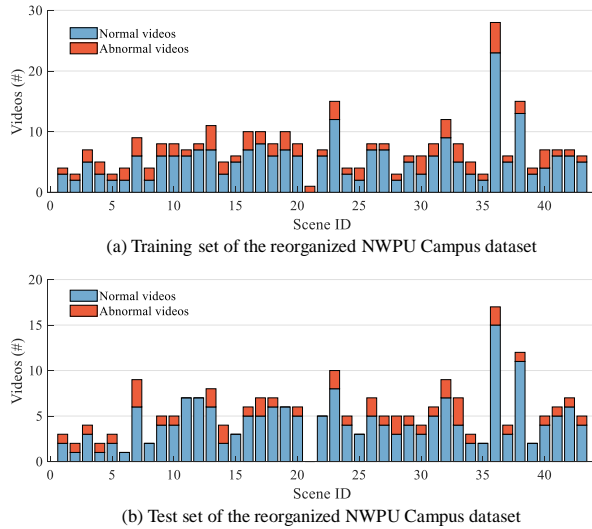

**Figure 1: Statistics of the number of normal and abnormal videos of each scene. Best viewed in color.**

## 1 REORGANIZATION FOR NWPU CAMPUS

**Table 1: The statistics of our reorganized NWPU Campus dataset.**

|                 | Training set | Test set | Total |
|-----------------|--------------|----------|-------|
| Normal videos   | 236          | 187      | 423   |
| Abnormal videos | 80           | 44       | 124   |
| Total           | 316          | 231      | 547   |

There are a total of 547 untrimmed videos in the NWPU Campus dataset [1], and the training set is all normal videos in the original split. We meticulously select 316 videos for the training set and 231 videos for the test set, which ensures that normal events appear in the normal videos and anomalous events exist in the abnormal videos, details are shown in Table 1.

Figure 1(a) and Figure 1(b) demonstrate the number of normal and abnormal videos of each scene in the training set and test set, respectively.

The data split for scene-dependent weakly supervised video anomaly detection is available at <https://github.com/shengyangsun/TDSD>.

## REFERENCES

- [1] Congqi Cao, Yue Lu, Peng Wang, and Yanning Zhang. 2023. A New Comprehensive Benchmark for Semi-supervised Video Anomaly Detection and Anticipation. In *CVPR*. 20392–20401.

\*Work done during an internship at Alibaba Cloud.

†Corresponding Author.
